# Supplementary material
Source: Royal Society of Chemistry journal article supplement (doi:10.1039/d6dt00696e)
Supplement: d6dt00696e1.pdf [file d6dt00696e1.pdf]

## Supporting Information

### Photochromic Bi<sub>2</sub>WO<sub>6</sub>/BiOBr ultrathin nanosheet heterojunctions for efficient photocatalytic synthesis of imine via toluene and aniline coupling

Jiazhen Han, Guanfeng Ji, Yao Dou, Yongli Qin, Xin Liu, Yun Zhang\*, Wenshou Wang\*

School of Chemistry and Chemical Engineering, University of Jinan, Jinan 250022, P.R. China

Corresponding Author: chm\_zhangy2022@ujn.edu.cn, chm\_wangws@ujn.edu.cn

#### Materials

Bismuth (III) nitrate pentahydrate (Bi(NO<sub>3</sub>)<sub>3</sub>·5H<sub>2</sub>O), tetramethylpiperidine (TEMPO, 98.0%), acetonitrile (CH<sub>3</sub>CN), p-benzoquinone (BQ, 99.0%), 1,3,5-trimethoxybenzene (AR, 98.0%), and ethylbenzene (C<sub>8</sub>H<sub>10</sub>) were purchased from Shanghai Macklin Chemical Reagent Co., Ltd. Potassium iodide (KI, AR, 99.0%), silver nitrate (AgNO<sub>3</sub>, AR, 99.8%), sodium tungstate dihydrate (Na<sub>2</sub>WO<sub>4</sub>·2H<sub>2</sub>O), aniline (C<sub>6</sub>H<sub>7</sub>N), barium sulfate (BaSO<sub>4</sub>), cetyltrimethylammonium bromide (CTAB), sodium chloride (NaCl) mannitol, ethyl acetate (C<sub>4</sub>H<sub>8</sub>O<sub>2</sub>) and dichloromethane (CH<sub>2</sub>Cl<sub>2</sub>) were purchased from Sinopharm Chemical Reagent Co., Ltd. Nitric acid (HNO<sub>3</sub>, 65-68%), toluene (C<sub>7</sub>H<sub>8</sub>) from Yantai Far East Fine Chemical Co., Ltd.

#### Characterization

Powder X-ray diffraction (XRD) patterns were recorded using a Rigaku SmartLab diffractometer equipped with graphite monochromatized Cu K $\alpha$  radiation ( $\lambda = 1.5418 \text{ \AA}$ ). The morphological and structural characterizations were performed using field emission scanning electron microscope (SEM, Zeiss, Gemini 300) and transmission electron microscopy (TEM, Hitachi-7700), equipped with an Energy Dispersive Spectrometer (EDS, Oxford, X-MaxN 50) for elemental composition analysis. X-ray photoelectron spectroscopy (XPS) was performed on a Thermo Scientific ESCALAB 250 XI and Thermo Fisher ESCALAB XI<sup>+</sup> spectrometer equipped with an Al K $\alpha$  X-ray source. Raman spectra of the samples were obtained by a micro-Raman LabRAM HR800 spectrometer (Horiba Jobin Yvon, Japan) with laser excitation at  $\lambda = 633 \text{ nm}$ . Electron spin resonance (EPR) spectrum was obtained using a EPR100 spectrometer at X-band at 25 °C. Low-temperature EPR spectra were acquired on a Bruker EMX PLUS spectrometer at 100 K. The Fourier transform infrared (FT-IR) spectra were acquired on a Bruker VERTEX 70 in the range of 400-2000 cm<sup>-1</sup>. Ultraviolet-visible (UV-vis) diffuse reflectance spectra were acquired in the spectral region of 200-800 nm with a Thermo UV-2600 spectrophotometer, using BaSO<sub>4</sub> as

reference. Photoluminescence (PL) spectra of the samples were collected on a Shimadzu HRF-6000 spectrometer with excitation wavelengths of 320 nm. The thickness of the samples was measured by atomic force microscopy (AFM, Dimension Icon) on mica substrates.

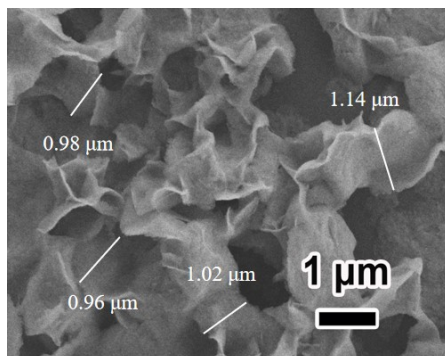

**Fig. S1** SEM image of  $\text{Bi}_2\text{WO}_6/\text{BiOBr}$  UNHs showing a size of approximately 1.00 μm.

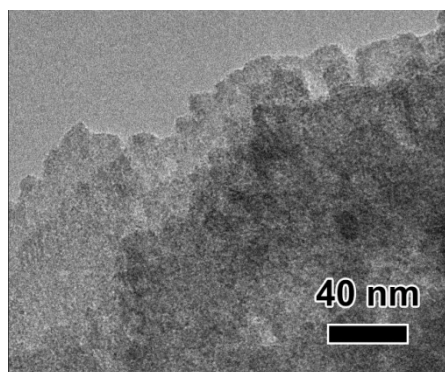

**Fig. S2** TEM image of  $\text{Bi}_2\text{WO}_6/\text{BiOBr}$  UNHs.

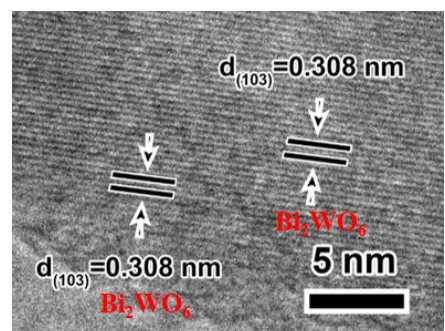

**Fig. S3** HRTEM image of  $\text{Bi}_2\text{WO}_6/\text{BiOBr}$  UNHs in other regions.

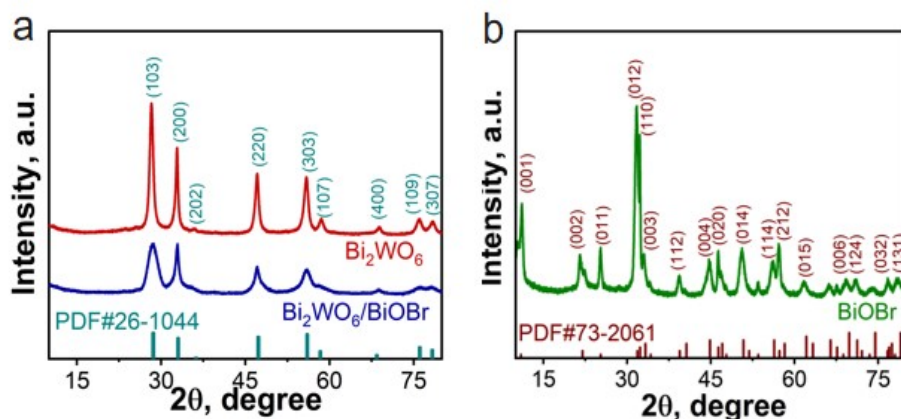

**Fig. S4** The XRD patterns of  $\text{Bi}_2\text{WO}_6$  and  $\text{Bi}_2\text{WO}_6/\text{BiOBr}$  UNHs (a),  $\text{BiOBr}$  after nitric acid treatment (b).

XRD analysis further confirmed the biphasic composition of the heterojunction sample, consisting of crystalline  $\text{Bi}_2\text{WO}_6$  and  $\text{BiOBr}$  phases (Fig. S3). The XRD pattern of the  $\text{Bi}_2\text{WO}_6/\text{BiOBr}$  UNHs displays a similar diffraction peak with that of pure  $\text{Bi}_2\text{WO}_6$  (JCPDS 26-1044). However, the diffraction peaks of heterojunctions are significantly broadened, which indicates the formation of ultrathin nanosheets. As comparison with pure  $\text{BiOBr}$  (JCPDS No. 73-2061), the diffraction peaks related to  $\text{BiOBr}$  in the heterojunctions is inapparent, which might be related to that the diffraction peaks of (012), (110), and (003) crystal planes of  $\text{BiOBr}$  are overlapped with the (200) crystal plane of  $\text{Bi}_2\text{WO}_6$ , and the content of  $\text{BiOBr}$  in the heterojunction is low (about 13%, Fig. 1e) leading to weak diffraction intensity.

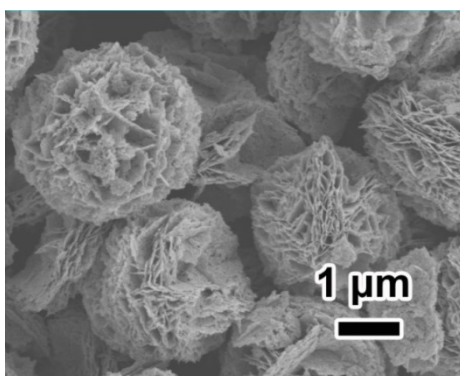

**Fig. S5** SEM image of  $\text{Bi}_2\text{WO}_6$ .

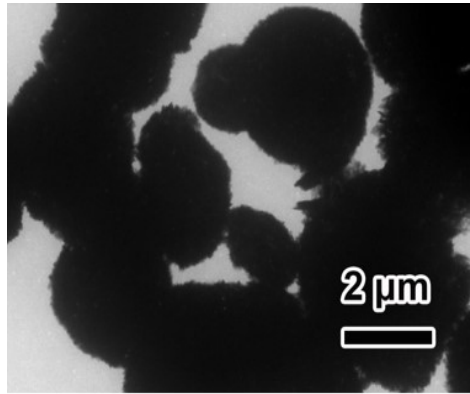

**Fig. S6** TEM image of Bi<sub>2</sub>WO<sub>6</sub>.

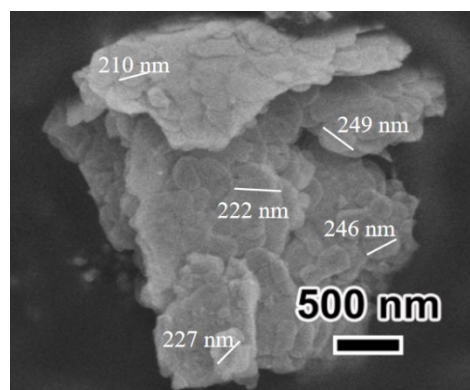

**Fig. S7** SEM image of BiOBr reveals a size of approximately 210 to 250 nm.

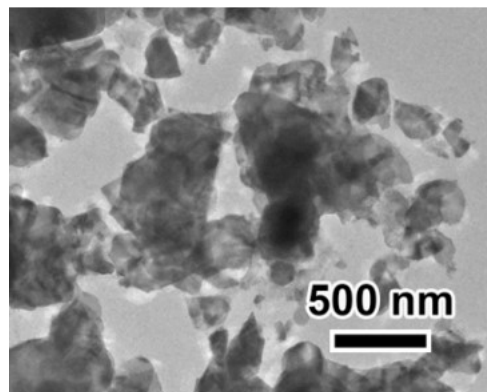

**Fig. S8** TEM image of BiOBr.

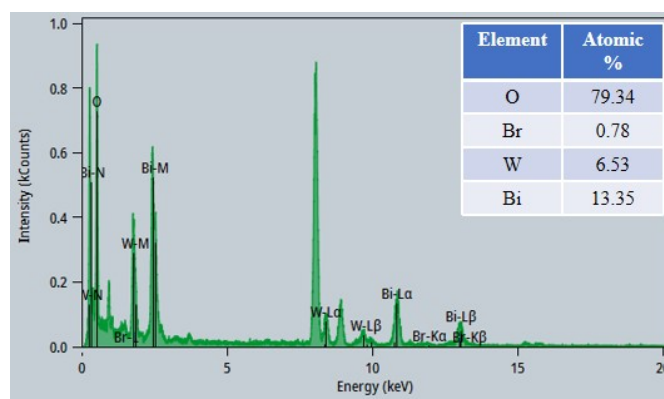

**Fig. S9** The EDS spectrum of typical  $\text{Bi}_2\text{WO}_6/\text{BiOBr}$  UNHs.

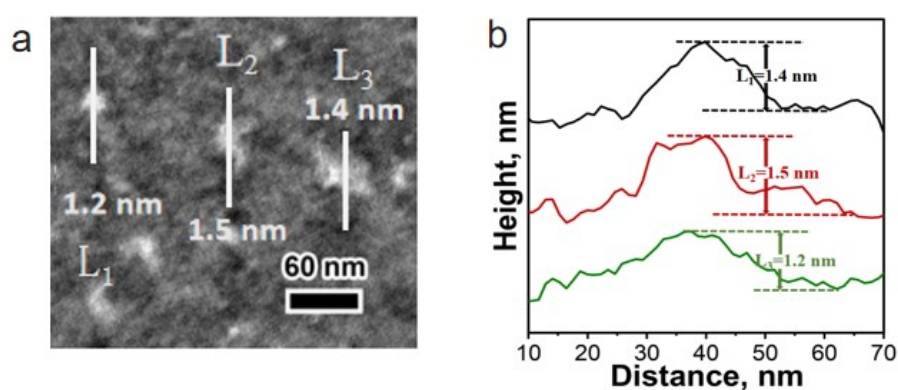

**Fig. S10** AFM image (a) and corresponding height profiles (b) of  $\text{Bi}_2\text{WO}_6/\text{BiOBr}$  UNHs.

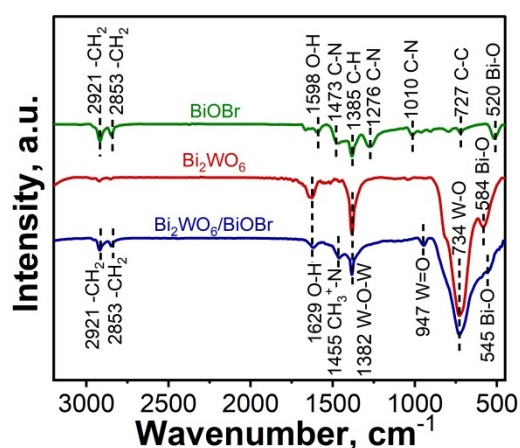

**Fig. S11** FT-IR spectra of  $\text{BiOBr}$ ,  $\text{Bi}_2\text{WO}_6$ , and  $\text{Bi}_2\text{WO}_6/\text{BiOBr}$  UNHs.

For  $\text{BiOBr}$ , the peaks located at 727, 1010, 1276, 1385, 1473, 2853, and 2921  $\text{cm}^{-1}$ , are attributed to the organic groups from CTAB. Specifically, the peaks at 2853 and 2921  $\text{cm}^{-1}$  are assigned to the C-H stretching modes, while those at 1010, 1276,

and 1473  $\text{cm}^{-1}$  correspond to C-N stretching vibrations. The peak at 727  $\text{cm}^{-1}$  is characteristic of C-C bonds. Furthermore, the spectra exhibited peaks at 1598 and 1629  $\text{cm}^{-1}$ , which are attributed to O-H stretching vibrations of adsorbed water.

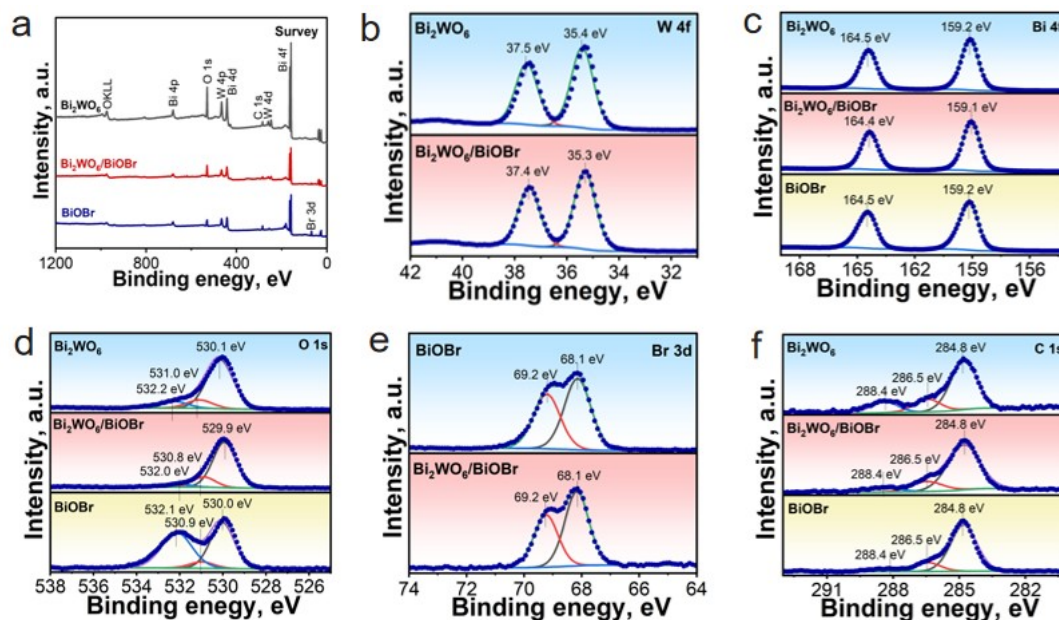

**Fig. S12** (a-f) The XPS survey (a), high-resolution XPS spectra of W 4f (b), Bi 4f (c), O 1s (d), Br 3d (e), and C 1s (f) of BiOBr,  $\text{Bi}_2\text{WO}_6$ , and  $\text{Bi}_2\text{WO}_6/\text{BiOBr}$  UNHs.

The XPS survey of  $\text{Bi}_2\text{WO}_6/\text{BiOBr}$  UNHs revealed element exists of Br, W, Bi and O, which verified the simultaneous presence of  $\text{Bi}_2\text{WO}_6$  and BiOBr (Fig. S12a). Fig. S12d presents the O 1s spectrum of  $\text{Bi}_2\text{WO}_6/\text{BiOBr}$  UNHs, with peaks at 529.9, 530.8, and 532.0 eV attributable to lattice oxygen (Bi-O), oxygen vacancies, and surface-adsorbed oxygen species, respectively<sup>S1</sup>. Compared to pure  $\text{Bi}_2\text{WO}_6$  and BiOBr, O 1s XPS peak of  $\text{Bi}_2\text{WO}_6/\text{BiOBr}$  UNHs was shifted to low binding energy about 0.1 eV. The Br 3d XPS spectra of both BiOBr and  $\text{Bi}_2\text{WO}_6/\text{BiOBr}$  UNHs display peaks at 68.1 and 69.2 eV, corresponding to Br 3d<sub>5/2</sub> and Br 3d<sub>3/2</sub> electrons (Fig. S12e)<sup>S2</sup>. As a reference, the C 1s spectra exhibited three characteristic peaks at 284.8, 286.5, and 288.4 eV, which are assigned to the C=C, C-C/C-O/C-N, and O-C=O functional groups, respectively (Fig. S12f)<sup>S3</sup>. The above results demonstrate that  $\text{Bi}_2\text{WO}_6/\text{BiOBr}$  UNHs were successfully constructed with strong interfacial interaction.

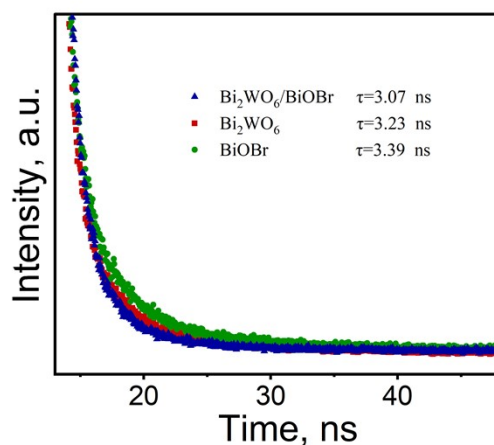

**Fig.S13** Time-resolved photoluminescence (TR-PL) decay spectra of BiOBr, Bi<sub>2</sub>WO<sub>6</sub>, and Bi<sub>2</sub>WO<sub>6</sub>/BiOBr UNHs.

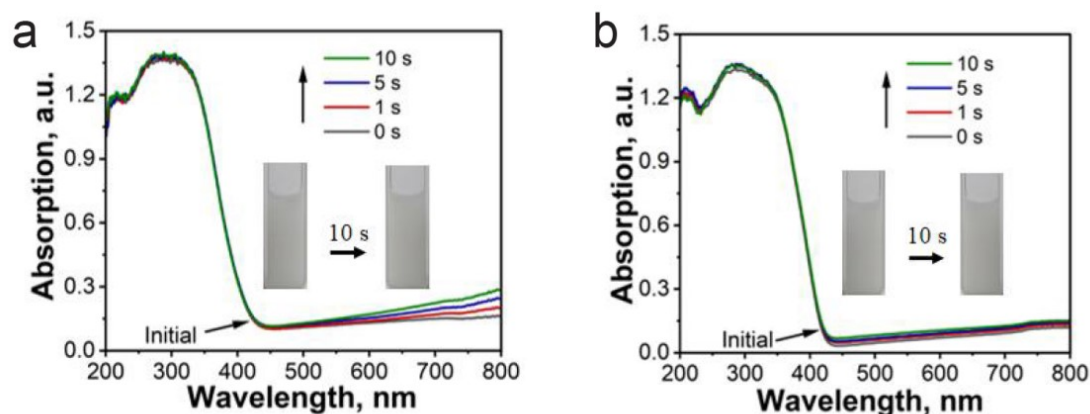

**Fig. S14** UV-vis diffuse reflectance spectra showing the coloration process of Bi<sub>2</sub>WO<sub>6</sub> (a) and BiOBr (b) in water. Inset in (a, b) are the corresponding digital photographs.

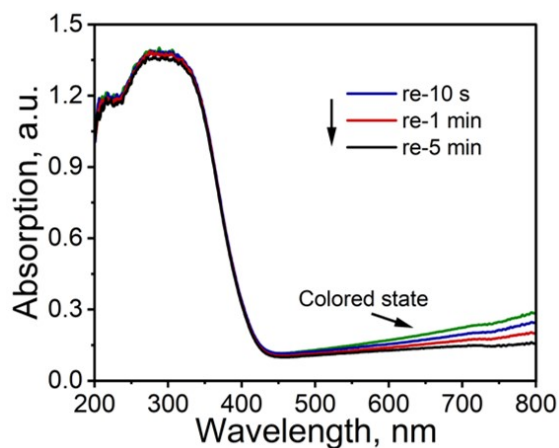

**Fig. S15** UV-vis diffuse reflectance spectra showing the decoloration process of

Bi<sub>2</sub>WO<sub>6</sub> in water in ambient condition.

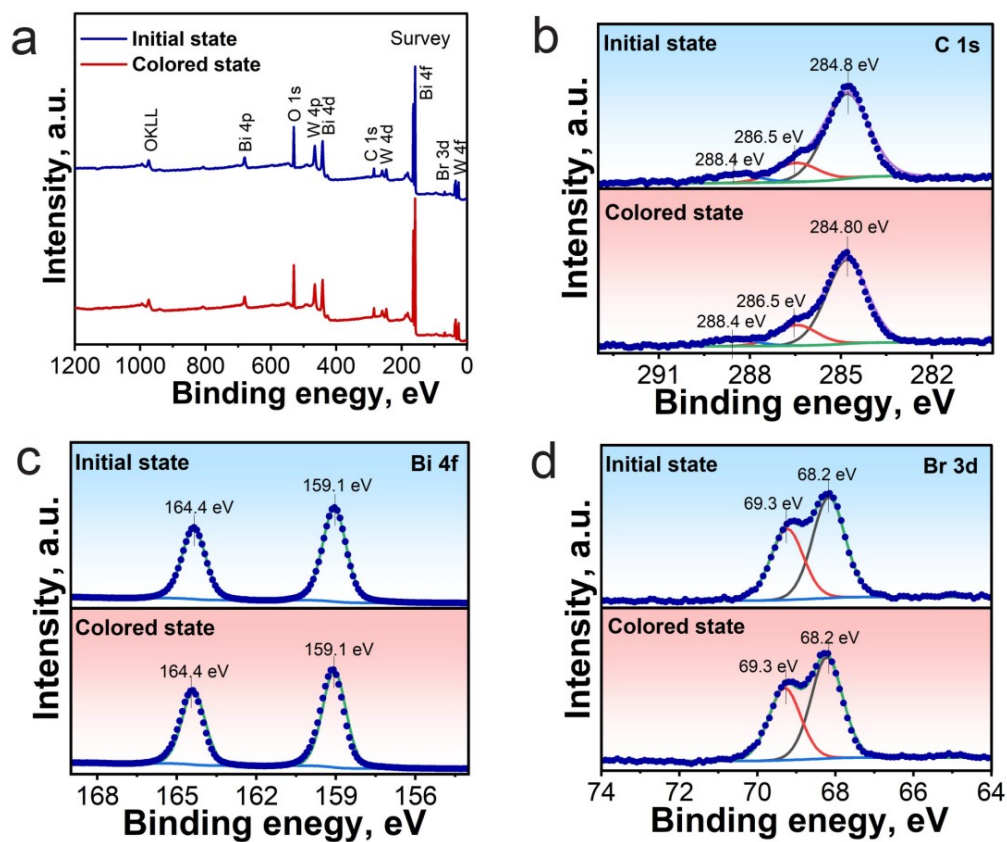

**Fig. S16** (a-d) The XPS survey (a), high-resolution XPS spectra of C 1s (b), Bi 4f (c), and Br (d) of Bi<sub>2</sub>WO<sub>6</sub>/BiOBr UNHs before and after 420 nm light irradiation.

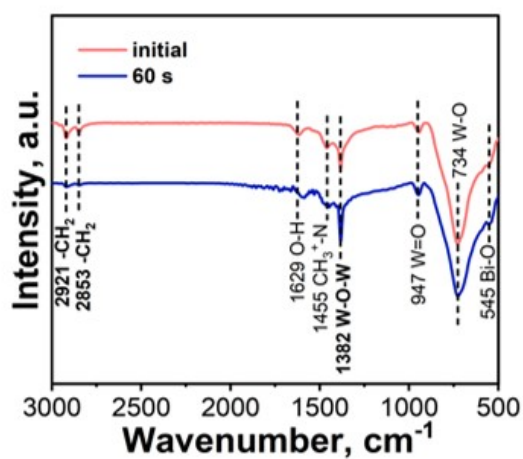

**Fig. S17** FT-IR spectra of Bi<sub>2</sub>WO<sub>6</sub>/BiOBr UNHs before and after 420 nm light irradiation.

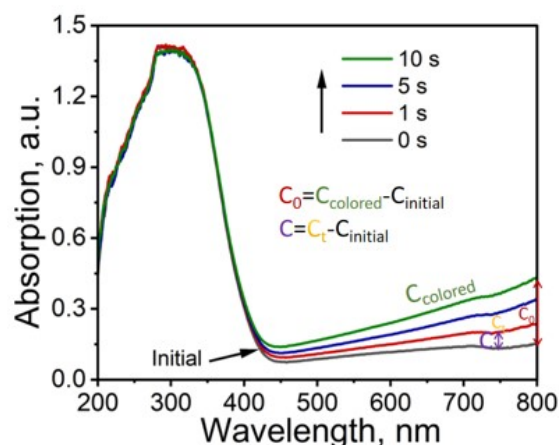

**Fig. S18** Schematic illustration of the calculating of  $C_0$  and  $C$  for BiOBr,  $\text{Bi}_2\text{WO}_6$ , and  $\text{Bi}_2\text{WO}_6/\text{BiOBr}$  UNHs in water.  $C_{\text{initial}}$  and  $C_{\text{colored}}$  represent the absorption intensity of the colorless initial aqueous dispersion (800 nm) and the absorption intensity of the colored state (800 nm) upon 420 nm light irradiation for 10 s, respectively.  $C_t$  represents the absorption intensity of the aqueous dispersion in various states at a certain time under 420 nm light irradiation during coloration process.  $C$  and  $C_0$  are defined as  $C = C_t - C_{\text{initial}}$  and  $C_0 = C_{\text{colored}} - C_{\text{initial}}$ . Then,  $C/C_0$  was used to describe the coloration rate of aqueous dispersion.

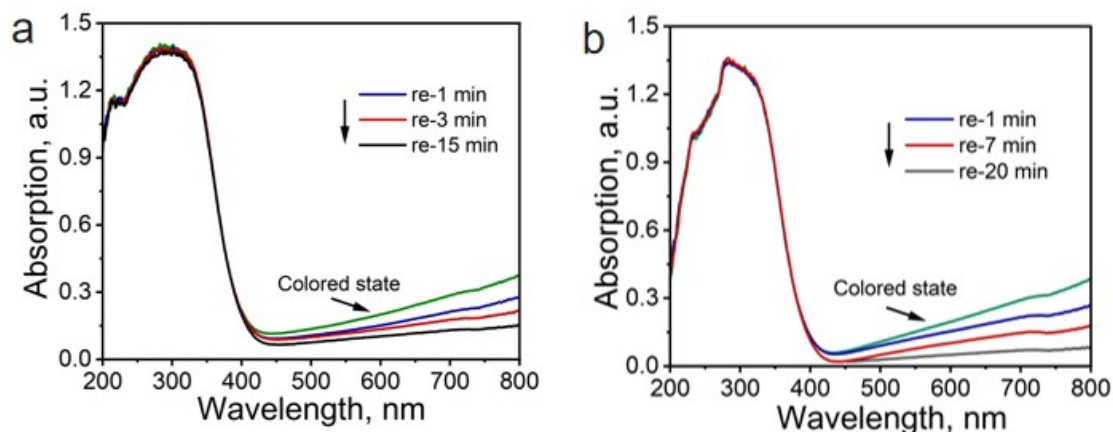

**Fig. S19** (a-b) UV-vis diffuse reflectance spectra showing the decoloration process of  $\text{Bi}_2\text{WO}_6/\text{BiOBr}$  UNHs in water (a) and mixed solvent of ethylbenzene: acetonitrile (1:1) (b) in ambient condition.

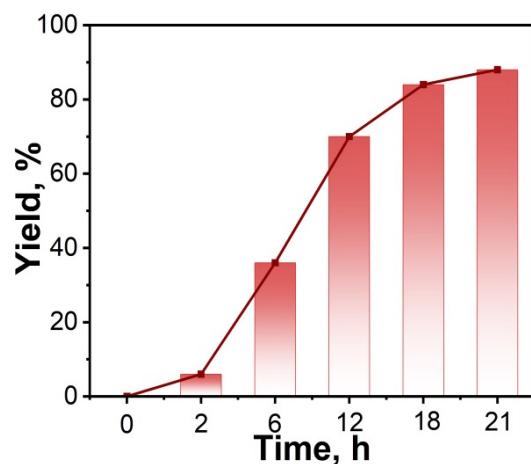

**Fig. S20** Time tracking of the ethylbenzene oxidation experiment.

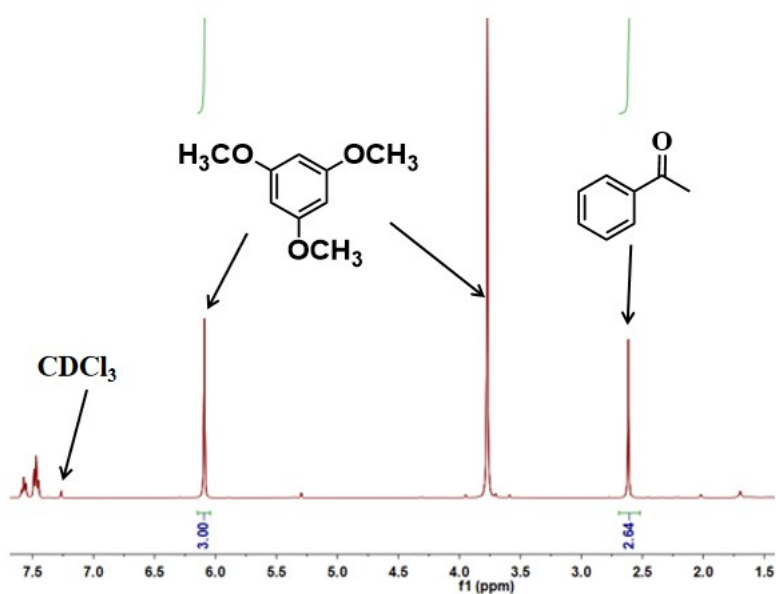

**Fig. S21**  $^1\text{H}$  NMR of acetophenone under standard condition. Standard condition: 298 K, oxygen, 0.1 mmol ethylbenzene, 3 mL MeCN, 10 mg  $\text{Bi}_2\text{WO}_6/\text{BiOBr}$  UNHs catalyst, 420 nm (100 W) LED light, 21 h (0.1 mmol 1,3,5-trimethoxybenzene as internal standard).

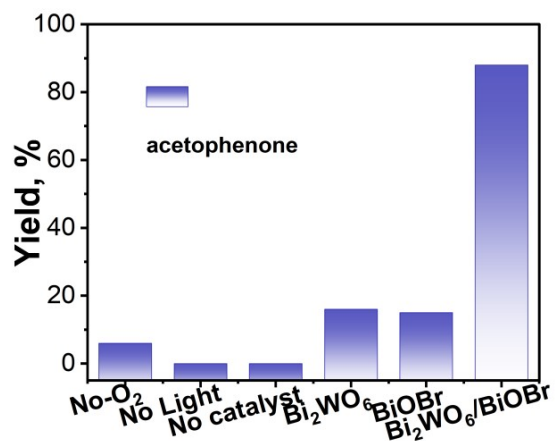

**Fig. S22** Photocatalytic oxidation of ethylbenzene under different conditions.

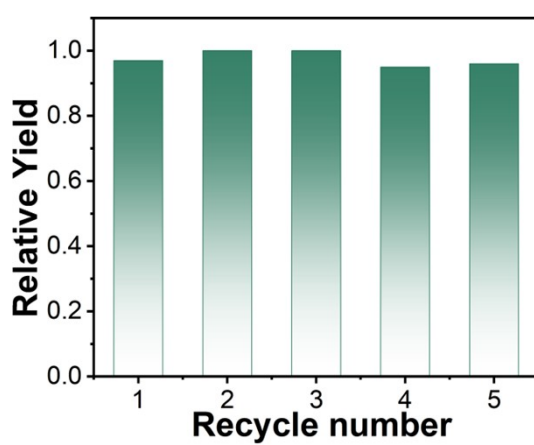

**Fig. S23** Cycle experiment of photocatalytic oxidation of ethylbenzene over Bi<sub>2</sub>WO<sub>6</sub>/BiOBr UNHs.

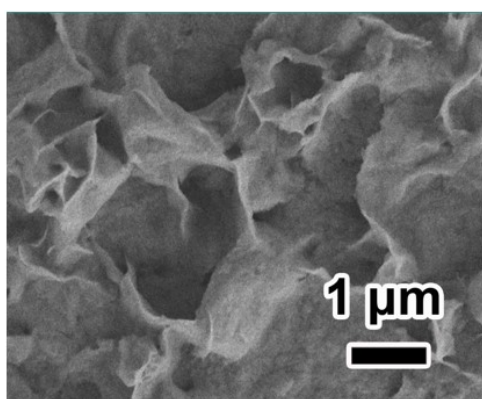

**Fig. S24** The SEM image of Bi<sub>2</sub>WO<sub>6</sub>/BiOBr UNHs after reaction.

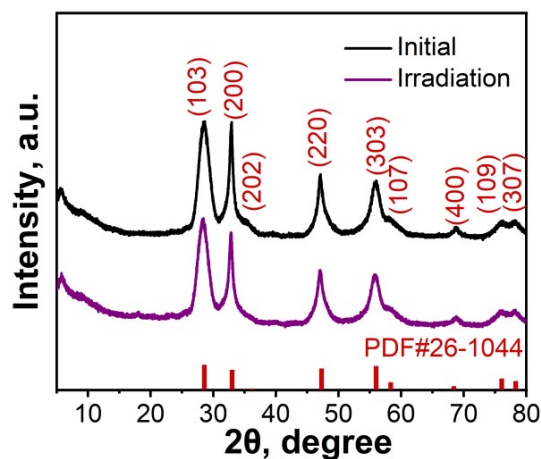

**Fig. S25** The XRD spectra of  $\text{Bi}_2\text{WO}_6/\text{BiOBr}$  UNHs before and after reaction.

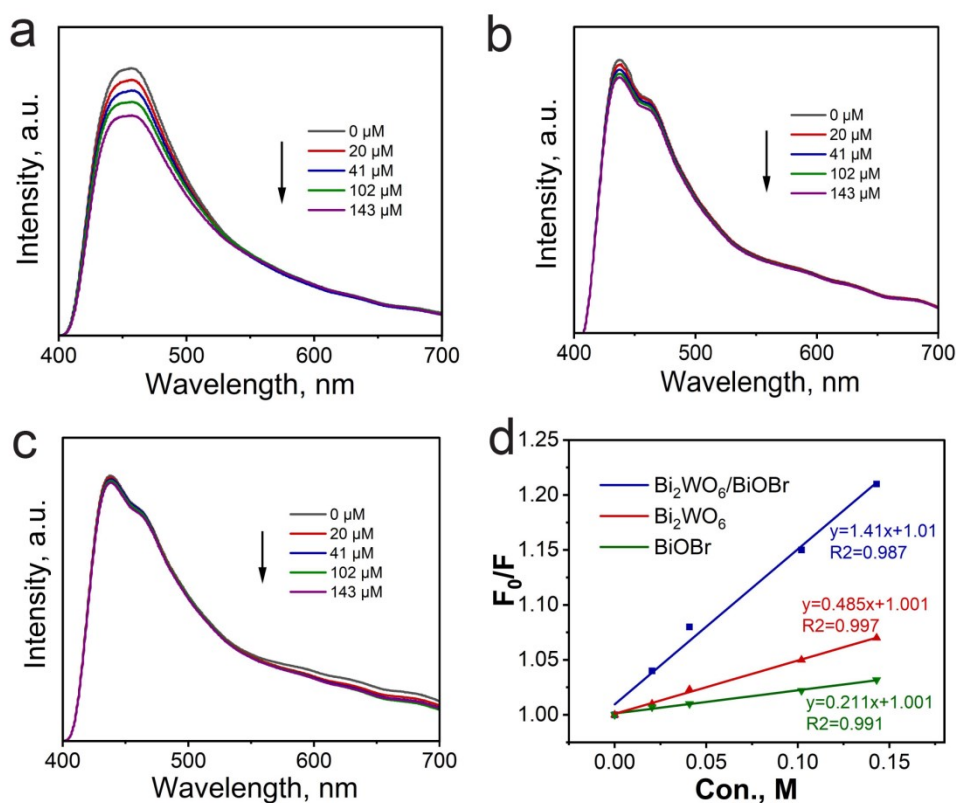

**Fig. S26** (a-c) Emission spectra of  $\text{Bi}_2\text{WO}_6/\text{BiOBr}$  UNHs (a),  $\text{Bi}_2\text{WO}_6$  (b), and  $\text{BiOBr}$  (c) at different concentrations of ethylbenzene, (d) Stern-Volmer plot of  $\text{Bi}_2\text{WO}_6$ ,  $\text{BiOBr}$ , and  $\text{Bi}_2\text{WO}_6/\text{BiOBr}$  UNHs at different concentrations of ethylbenzene.

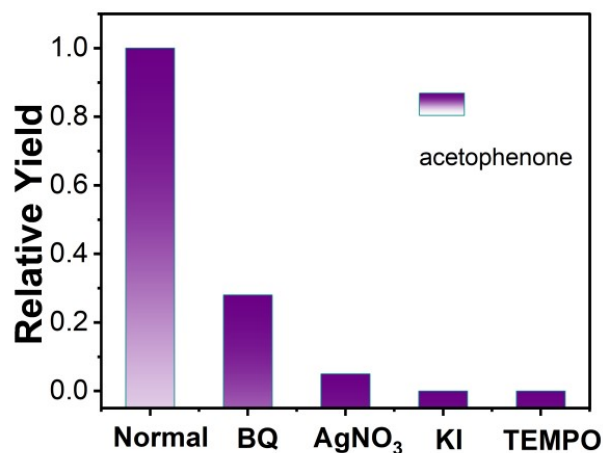

**Fig. S27** Relationship between the yield of the oxidative reaction and additives.

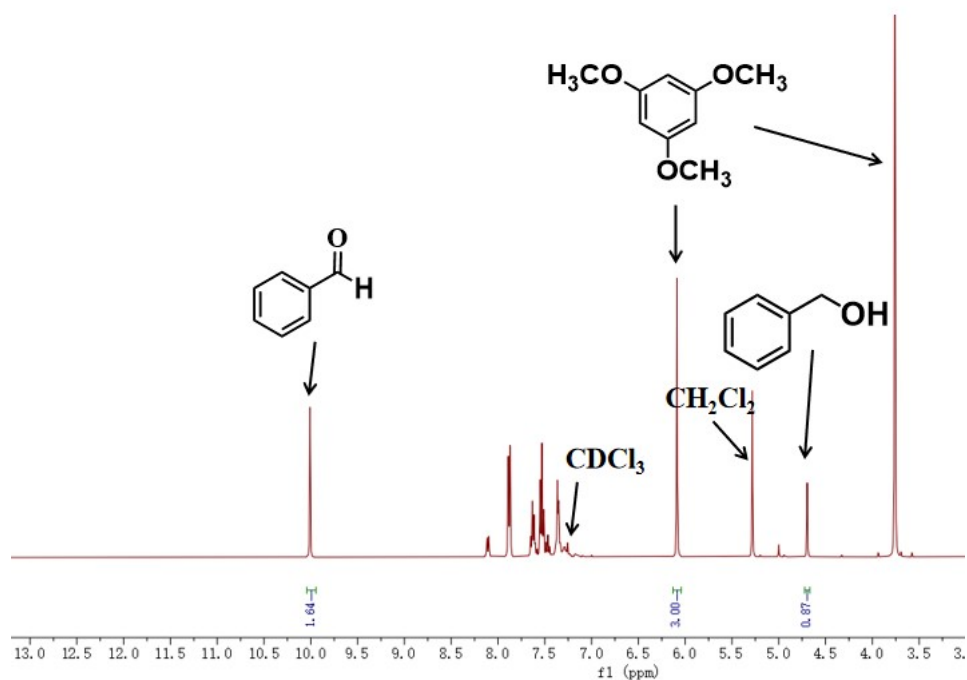

**Fig. S28** <sup>1</sup>H NMR of benzaldehyde from the photocatalytic oxidation of toluene under standard condition. Standard condition: 298 K, 1 mL toluene, 2 mL MeCN, 10 mg Bi<sub>2</sub>WO<sub>6</sub>/BiOBr UNHs, 405 nm (100 W) LED light, 2 h (0.1 mmol 1,3,5-trimethoxybenzene as internal standard). The toluene was evaporated during the rotary evaporation process in the preparation of the <sup>1</sup>H NMR sample.

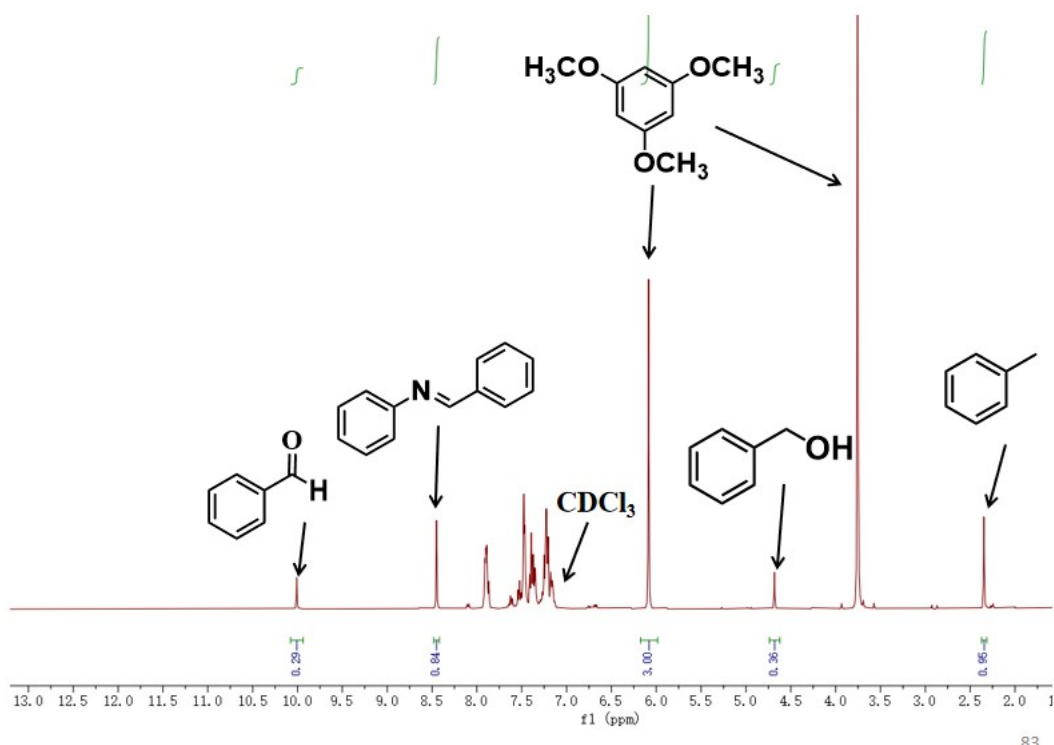

**Fig. S29** <sup>1</sup>H NMR of imines from the photocatalytic oxidation of toluene coupled with aniline under standard condition. Standard condition: 298 K, 1 mL toluene (2 h), 0.1 mmol aniline (2 h), 2 mL MeCN, 10 mg Bi<sub>2</sub>WO<sub>6</sub>/BiOBr UNHs, 405 nm (100 W) LED light. The yield was determined by <sup>1</sup>H NMR spectroscopy using 0.1 mmol 1,3,5-trimethoxybenzene as an internal standard.

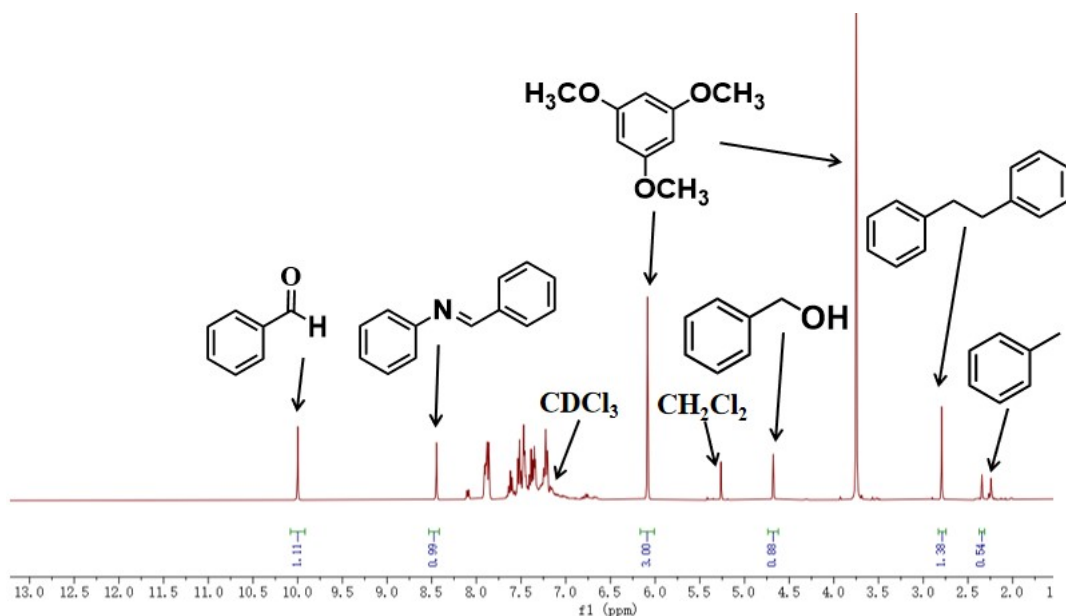

**Fig. S30** <sup>1</sup>H NMR of imines from the photocatalytic oxidation of toluene coupled with aniline under standard condition. Standard condition: 298 K, 1 mL toluene (2 h), 0.1 mmol aniline (4 h), 2 mL MeCN, 10 mg Bi<sub>2</sub>WO<sub>6</sub>/BiOBr UNHs, 405 nm (100 W)

LED light. The yield was determined by  $^1\text{H}$  NMR spectroscopy using 0.1 mmol 1,3,5-trimethoxybenzene as an internal standard.

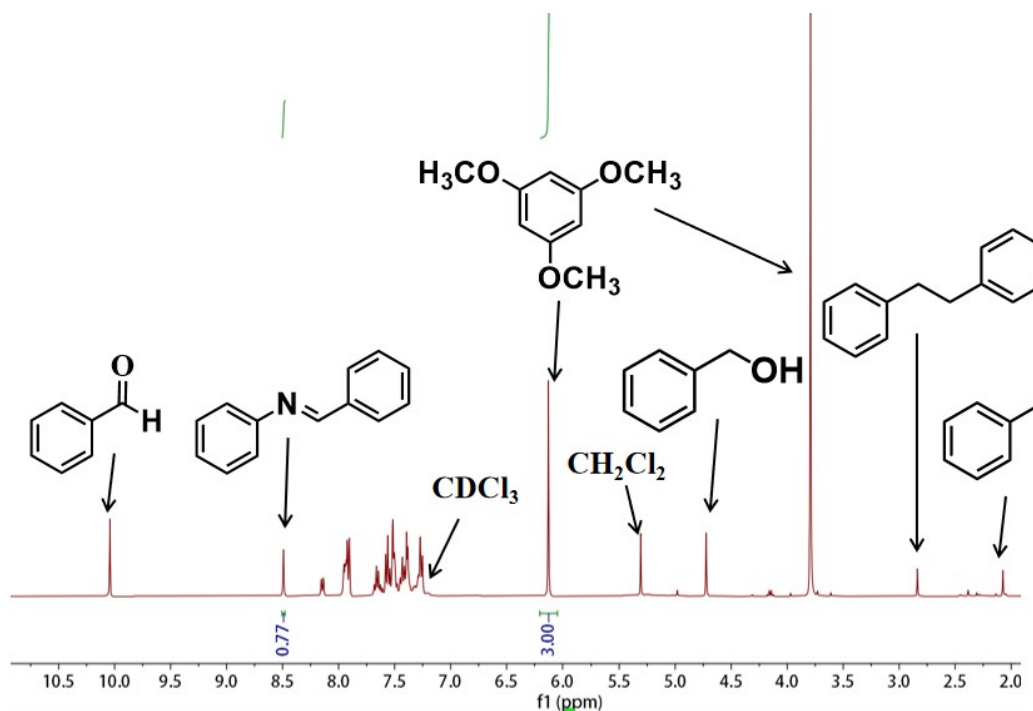

**Fig. S31**  $^1\text{H}$  NMR of imines from the photocatalytic oxidation of toluene coupled with aniline (in the absence of light, in the process of amine condensation reaction).

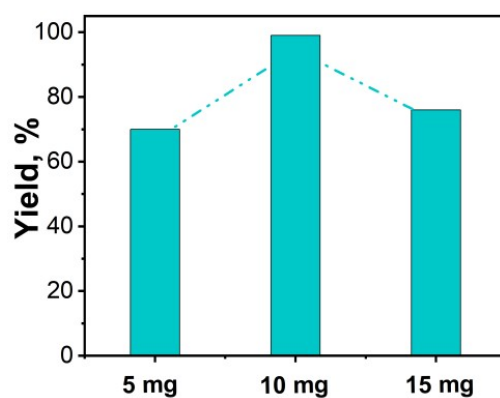

**Fig. S32** Photocatalytic performance of coupling toluene with aniline with different amount of photocatalyst in a mixed solvents of 2 ml of acetonitrile and 1 ml of toluene.

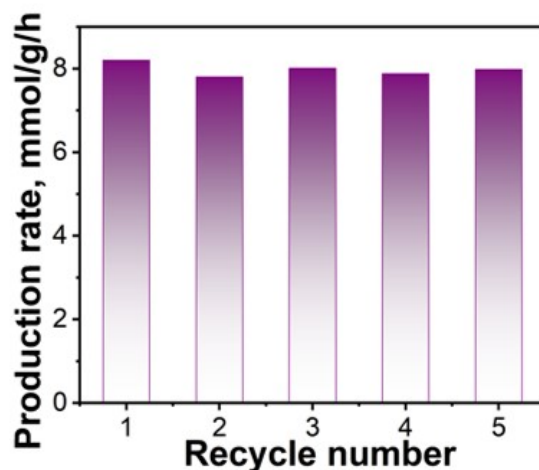

**Fig. S33** Cycling experiment of photocatalytic oxidation of toluene over  $\text{Bi}_2\text{WO}_6/\text{BiOBr}$  UNHs.

**Table S1.** Comparison of the photocatalytic aerobic oxidation of ethylbenzene activities of the reported heterogeneous materials

| Catalyst                                   | Catalyst amount (mg) | Oxidant                           | Time (h) | Substrate | Power (w) | Wavelength or Temperature | Yield  | Ref. |
|--------------------------------------------|----------------------|-----------------------------------|----------|-----------|-----------|---------------------------|--------|------|
| $\text{BiOBr}_{0.98}\text{I}_{0.02}$       | 10                   | $\text{O}_2$                      | 15       | 30 mmol   | 100       | 450 nm                    | 9.1 %  | S4   |
| W-TiO <sub>2</sub>                         | 10                   | $\text{O}_2$                      | 10       | 3 mL      | 100       | 437 nm                    | 8.6 %  | S5   |
| TiO <sub>2</sub> -PEG200                   | 10                   | $\text{O}_2$                      | 6        | 3 mL      | 100       | 405 nm                    | 13.8 % | S3   |
| Br-CN                                      | 180                  | $\text{O}_2$                      | 24       | 20 mmol   | 300       | $\lambda > 420$ nm        | 29 %   | S6   |
| 0.27% PdO/C– $\text{Nb}_2\text{O}_5$       | 100                  | $\text{O}_2$                      | 12       | 20 mmol   | 10        | 400-405 nm                | 65.8 % | S7   |
| BBI -0.85                                  | 10                   | $\text{O}_2$                      | 5        | 0.1 mmol  | 8         | 455 nm                    | 81 %   | S8   |
| p-BiOBr                                    | 20                   | $\text{C}_4\text{H}_{10}\text{O}$ | 10       | 0.2 mmol  | 300       | xenon lamp                | 93 %   | S9   |
| VO@g-C <sub>3</sub> N <sub>4</sub>         | 25                   | $\text{H}_2\text{O}_2$            | 24       | 1 mmol    | 40        | bulb                      | 99 %   | S10  |
| $\text{Ce}_{0.5}\text{Mn}_{0.5}\text{O}_x$ | 30                   | $\text{O}_2$                      | 6        | 1 mmol    |           | 120 °C                    | 18 %   | S11  |
| $\text{Ce}_1/\text{NC}$                    | 10                   | $\text{O}_2$                      | 48       | 0.1 mmol  |           | 45 °C                     | 80 %   | S12  |
| This work                                  | 10                   | $\text{O}_2$                      | 21       | 0.1 mmol  | 100       | 420 nm                    | 88 %   |      |

## Supplementary references

- [S1] X. Kong, W. Lee, A. Mohamed, S. Chai, Effective steering of charge flow through synergistic inducing oxygen vacancy defects and P-N heterojunctions in 2D/2D surface-engineered Bi<sub>2</sub>WO<sub>6</sub>/BiOI cascade: Towards superior photocatalytic CO<sub>2</sub> reduction activity, *Chem. Eng. J.* 372 (2019) 1183-1193.
- [S2] Y. Zhang, Y. Li, Y. Yuan, Carbon quantum dot-decorated BiOBr/Bi<sub>2</sub>WO<sub>6</sub> photocatalytic micromotor for environmental remediation and DFT calculation, *ACS Catal.* 12 (22) (2022) 13897-13909.
- [S3] X. Zhang, Y. Zhang, Z. Feng, J. Zhao, Z. Yang, X. Wang, W. Wang, Self-accelerating photocharge separation in BiOBr ultrathin nanosheets for boosting photoreversible color switching, *Chem. Eng. J.* 428 (2022) 131235.
- [S4] Y. Shan, C. Han, X. Wang, Z. Zhang, M. Yan, G. Ji, W. Wang, Photochromic-activity relationship insights for boosting C(sp<sup>3</sup>)-H bonds activation in the BiOBr<sub>1-x</sub>I<sub>x</sub> colloid ultrathin nanosheets, *Surf. Interfaces.* 72 (2025) 106965.
- [S5] Z. Zhang, Y. Zhang, C. Han, M. Yan, G. Ji, W. Wang, Efficient photo-oxidation of C(sp<sup>3</sup>)-H bonds on visible-light-responsive W-doped TiO<sub>2</sub> nanocrystals promoted by the photochromic effect, *Inorg. Chem. Front.* 12 (15) (2025) 4720-4730.
- [S6] H. Zhu, J. Zhao, C. Ma, Z. Yu, J. Li, Q. Meng, Bridging effect of carbon nitride with more negative conduction potential and halogens promotes the liquid-phase oxidation of aromatic C-H bonds, *ACS Appl. Mater. Interfaces.* 15 (51) (2023) 59280-59295.
- [S7] X. Jiang, W. Wang, H. Wang, Z. He, Y. Yang, K. Wang, Z. Liu, B. Han, Solvent-free aerobic photocatalytic oxidation of C(sp<sup>3</sup>)-H and C(sp<sup>3</sup>)-OH to C=O bonds, *Green Chem.* 26 (8) (2024) 4552-4562.
- [S8] Y. Bian, Y. Gu, X. Zhang, H. Chen, Z. Li, Engineering BiOBr<sub>1-x</sub>I<sub>x</sub> solid solutions with enhanced singlet oxygen production for photocatalytic benzylic C-H bond activation mediated by N-hydroxyl compounds, *Chin. Chem. Lett.* 32 (9) (2021) 2837-2840.
- [S9] X. Cao, A. Huang, C. Liang, H. Chen, T. Han, R. Lin, Q. Peng, Z. Zhuang, R. Shen, H. Chen, Y. Yu, C. Chen, Y. Li, Engineering lattice disorder on a photocatalyst: photochromic BiOBr nanosheets enhance activation of aromatic C-H bonds via water oxidation, *J. Am. Chem. Soc.* 144

(8) (2022) 3386-3397.

[S10] S. Verma, R. Baig, M. Nadagouda, R. Varma, Photocatalytic C-H activation of hydrocarbons over VO@g-C<sub>3</sub>N<sub>4</sub>, ACS Sustainable Chem. Eng. 4 (4) (2016) 2333-2336.

[S11] P. Zhang, H. Lu, Y. Zhou, L. Zhang, Z. Wu, S. Yang, H. Shi, Q. Zhu, Y. Chen, S. Dai, Mesoporous MnCeO<sub>x</sub> solid solutions for low temperature and selective oxidation of hydrocarbons, Nat. Commun. 6 (2015) 8446.

[S12] X. Zhang, Y. Zhong, H. Chen, Y. Cheng, Q. Sun, H. Zhang, Q. He, Y. Zhang, G. Guo, X. He, H. Ji, Synthesis of nitrogen-doped carbon supported cerium single atom catalyst by ball milling for selective oxidation of ethylbenzene, Chem. Res. Chin. Univ. 38 (5) (2022) 1258-1262.
